# Supplementary material
Source: Research Square preprint supplement (doi:10.21203/rs.3.rs-10009342/v1)
Supplement: Supplementary file 1 [file 6393c114fd6aef901d345753.docx]

# Additional information

*Table 1: Attrition calculation table [calculation demonstration and instructions available:* (33)*]*

|  | **Lagdo** | | | **Pitoa** | | |
| --- | --- | --- | --- | --- | --- | --- |
|  | **First Round (12 months)** | **Second Round (24 months)** | **Third Round (36 months)** | **First Round (12 months)** | **Second Round (24 months)** | **Third Round (36 months)** |
| ITNs received from mass campaign | 432 | N/A | N/A | 381 | N/A | N/A |
| ITNs in sampling frame for SDM round | 432 | 326 | 266 | 381 | 317 | 263 |
| Sample size | 30 | 30 | 30 | 30 | 30 | 30 |
| ITNs solicited to withdraw 30 ITNs | 30 | 98 | 104 | 30 | 109 | 121 |
| ITNs with unknown status | 16 | 51 | 36 | 13 | 55 | 32 |
| HH moved away | N/A | 13 | 10 | N/A | 0 | 10 |
| Total ITNs in HHs moved away | N/A | 13 | 10 | N/A | 0 | 10 |
| HH nobody home | N/A | 35 | 15 | N/A | 53 | 13 |
| Refused | N/A | 0 | 0 | N/A | 0 | 0 |
| Total ITNs in HHs that refused | N/A | 0 | 0 | N/A | 0 | 0 |
| Used by family elsewhere | 16 | 3 | 11 | 13 | 2 | 9 |
| ITNs with known status | 416 | 47 | 56 | 368 | 54 | 86 |
| Present | 356 | 30 | 42 | 347 | 30 | 33 |
| Withdrawn | 30 | 30 | 30 | 30 | 30 | 30 |
| Not withdrawn | N/A | 0 | 12 | N/A | 0 | 3 |
| Not present | 60 | 17 | 26 | 21 | 24 | 56 |
| Wear and tear | 27 | 4 | 23 | 5 | 4 | 42 |
| Given away to others | 30 | 9 | 1 | 14 | 4 | 2 |
| Lost unknown reasons | 3 | 4 | 2 | 2 | 16 | 12 |
| Total attrition | 13.9% | 41.2% | 42.5% | 5.5% | 42.5% | 50.5% |
| Total attrition due to wear and tear | 6.3% | 12.7% | 31.5% | 1.3% | 7.5% | 35.0% |

*Table 2: Characterization of mosquito population*

|  | **Pre-distribution** | **First Round**  **(12 months)** | **Second Round**  **(24 months)** | **Third Round**  **(36 months)** |
| --- | --- | --- | --- | --- |
| **pry susceptible strain**  **[*An. gambiae* Kisumu]** | **% Mortality (n)** | **% Mortality (n)** | **% Mortality (n)** | **% Mortality (n)** |
| % Mortality (24hr) for pry (Alpha-cypermethrin 0.05%)] using WHO tube tests | 95.8% (273/285) | 100% (100/100) | 100% (100/100) | 100% (80/80) |
| % Mortality (24h-48h-72h) for CFP using CDC bottle bioassays at 100ug/bottle. | N/A | 100% (90/90) | 100% (100/100) | 100% (100/100) |
| Species composition of strain (PCR) | N/A | *An. gambiae* s.s.  100% (30/30) | *An. gambiae* s.s.  100% (30/30) | *An. gambiae* s.s.  100% (30/30) |
| Kdr west (L1014F) frequency | N/A | 0% (0/30) | 0% (0/30) | 0% (0/30) |
| Kdr east (L1014S) frequency | N/A | 0% (0/30) | 0% (0/30) | 0% (0/30) |
|  | **Pre-distribution** | **First Round**  **(12 months)** | **Second Round**  **(24 months)** | **Third Round**  **(36 months)** |
| **pry resistant/wild strain**  **[*An. coluzzii* Monatele]** | **% Mortality (n)** | **% Mortality (n)** | **% Mortality (n)** | **% Mortality (n)** |
| % Mortality (24hr) for PY (Alpha-cypermethrin 0.05%)] using WHO tube tests | 0.0 (0/88) | 0% (0/88) | 1.04 %±2.08 (1/97) | 14 %±6.4 (12/88) |
| % Mortality (24hr) for [0.05% alpha-cypermethrin] + PBO [(4%)] using WHO tube test | 66.0  (58/87) | 66%  (58/87) | 65.8% ±11.2 (64/97) | 61 %±6.2  (48/80) |
| % Mortality (24h-48h-72h) in CFP using CDC bottle bioassays at 100ug/bottle. | 24H - 69.5 (59/85)  N/A  72H-96.5 (82/85) | 24H- 69.5% (59/85)  48h - 87.1% (74/85)  72H- 96.5% (82/85) | 24H--- 62%±8 (62/100)  48H - 92%±1.6 (92/100)  72H-- 98%±1.1 (98/100) | 24H - 86.3%±5.7 (75/87)  48H - 98.8%±1.1 (86/87)  72H - 98.8%±1.1 (86/87) |
| Species composition of strain (PCR) | *An. gambiae s.s 95% (38/40)*  *An. coluzzii 5% (2/40)* | *An. gambiae* s.s 95% (38/40)  *An. coluzzii* 5% (2/40) | *An. gambiae* s.s 97% (29/30)  *An. coluzzii* 3% (1/30) | *An. gambiae* s.s  96% (48/50)  *An. coluzzii*  4% (2/50) |
| Kdr west (L1014F) frequency | N/A | R allele 100% (RR:40/40) | R allele 100% (RR:30/30) | R allele 100% (RR:50/50) |
| Kdr east (L1014S) frequency | N/A | R allele 2%  (RR: 0/40) (RS:2/40)  S allele 98% (SS:38/40) | R allele 3%  (RR:0/33)  (RS: 2/33)  S allele 97%  (SS: 31/33) | R allele 6%  (RR:3/50)  (RS: 0/50)  S allele 94%  (SS: 47/50) |
| PCR: Polymerase Chain Reaction  N/A: Not applicable | | | | |

*Table 3: Insecticide effectiveness and chemical content results of campaign ITNs: DNP*

| **Pitoa (DNP)** | **Pre-distribution** | | **First Round**  **(12 months)** | | **Second Round**  **(24 months)** | | **Third Round**  **(36 months)** | |
| --- | --- | --- | --- | --- | --- | --- | --- | --- |
| Mean months since campaign | NA | | 15.8 | | 25.3 | | 35.4 | |
| Susceptible mosquito strain (An. gambiae Kisumu) | % (SD) | | % (95 % CI or SD) | | % (95 % CI or SD) | | % (95 % CI or SD) | |
| Pre-distribution/Field samples | N=20 | | N=30 | | N=30 | | N=30 | |
| Knock down 60 minutes |  |  |  |  |  |  |  |  |
| Mean | 100 | (0.0) | 100 | (100- 100) | 95.5 | (92.3-98.7) | 96.4 | (89.3-103.5) |
| Median [IQR] | 100 | (100- 100) | 100 | (100- 100) | 97.6 | (92.5- 100) | 100 | (100- 100) |
| Mortality 24 hours |  |  |  |  |  |  |  |  |
| Mean | 100 | (0.0) | 99.7 | (99.3-100.1) | 92.2 | (87.6-96.7) | 99.8 | (99.5-100.2) |
| Median [IQR] | 100 | (100- 100) | 100 | (100- 100) | 97.5 | (87.5- 100) | 100 | (100- 100) |
| Positive control (pry +PBO) | N/A | | N=1 | | N=2 | | N=2 | |
| Knock down 60 minutes |  |  |  |  |  |  |  |  |
| Mean | N/A | N/A | 100 | (0.0) | 97.4 | (3.7) | 100 | (0.0) |
| Median [IQR] | N/A | N/A | 100 | (100- 100) | 97.4 | (94.7- 100) | 100 | (100- 100) |
| Mortality 24 hours |  |  |  |  |  |  |  |  |
| Mean | N/A | N/A | 100 | (0.0) | 94.7 | (7.4) | 100 | (0.0) |
| Median [IQR] | N/A | N/A | 100 | (100- 100) | 94.7 | (89.5- 100) | 100 | (100- 100) |
| Positive control (pry-only) | N/A | | N=1 | | N=2 | | N=2 | |
| Knock down 60 minutes |  |  |  |  |  |  |  |  |
| Mean | N/A | N/A | 100 | (0.0) | 84.1 | (22.5) | 100 | (0.0) |
| Median [IQR] | N/A | N/A | 100 | (100- 100) | 84.1 | (68.2- 100) | 100 | (100- 100) |
| Mortality 24 hours |  |  |  |  |  |  |  |  |
| Mean | N/A | N/A | 72.4 | (0.0) | 79.2 | (9.2) | 88.4 | (2.9) |
| Median [IQR] | N/A | N/A | 72.4 | (72.4-72.4) | 79.2 | (72.7-85.7) | 88.4 | (86.4-90.5) |
| Untreated control | N=2 | | N=1 | | N=2 | | N=2 | |
| Knock down 60 minutes |  |  |  |  |  |  |  |  |
| Mean | 0.0 | (0.0) | 0.0 | (0.0) | 0.0 | (0.0) | (0.0) | (0.0) |
| Median [IQR] | 0.0 | (0.0-0.0) | 0.0 | (0.0-0.0) | 0.0 | (0.0-0.0) | (0.0) | (0.0-0.0) |
| Mortality 24 hours |  |  |  |  |  |  |  |  |
| Mean | 0.0 | (0.0) | 0.0 | (0.0) | 4.8 | (6.7) | (0.0) | (0.0) |
| Median [IQR] | 0.0 | (0.0-0.0) | 0.0 | (0.0-0.0) | 4.8 | (0.0-9.5) | 2.0 | (0.0-0.0) |
| Resistant mosquito strain (*An. coluzzii* Monatele) | % (SD) | | % (95 % CI or SD) | | % (95 % CI or SD) | | % (95 % CI or SD) | |
| Pre-distribution/Field samples | N=20 | | N=30 | | N=30 | | N=30 | |
| Knock down 60 minutes |  |  |  |  |  |  |  |  |
| Mean | 50.5 | (17.9) | 37.0 | (25.6-48.4) | 50.8 | (37.8-63.8) | 12.0 | (7.5-16.5) |
| Median [IQR] | 46.9 | (34.1-67.5) | 33.6 | (20.3-54.4) | 55.4 | (30.6-67.6) | 9.5 | (2.8-16.7) |
| Mortality 24 hours |  |  |  |  |  |  |  |  |
| Mean | 23.0 | (12.6) | 24.2 | (16.9-31.6) | 16.4 | (9.3-23.6) | 5.1 | (3.0-7.2) |
| Median [IQR] | 20.3 | (13.0-36.1) | 22.5 | (11.9-39.0) | 12.3 | (3.0-21.1) | 4.8 | (2.5-7.7) |
| Positive control (pry +PBO) | N=1 | | N=3 | | N=2 | | N=1 | |
| Knock down 60 minutes |  |  |  |  |  |  |  |  |
| Mean | N/A | N/A | 19.7 | (9.7) | 53.4 | (1.7) | 0.0 | (0.0) |
| Median [IQR] | N/A | N/A | 23.2 | (8.8-27.1) | 53.4 | (52.2-54.5) | 0.0 | (0.0-0.0) |
| Mortality 24 hours |  |  |  |  |  |  |  |  |
| Mean | N/A | N/A | 23.7 | (4.9) | 22.2 | (0.7) | 8.7 | (0.0) |
| Median [IQR] | N/A | N/A | 23.1 | (19.2-28.9) | 22.2 | (21.7-22.7) | 8.7 | (8.7-8.7) |
| Untreated control | N=1 | | N=3 | | N=2 | | N=1 | |
| Knock down 60 minutes |  |  |  |  |  |  |  |  |
| Mean | 0.0 | (0.0) | 0.0 | (0.0) | 0.0 | (0.0) | 0.0 | (0.0) |
| Median [IQR] | 0.0 | (0.0-0.0) | 0.0 | (0.0-0.0) | 0.0 | (0.0-0.0) | 0.0 | (0.0-0.0) |
| Mortality 24 hours |  |  |  |  |  |  |  |  |
| Mean | 0.0 | (0.0) | 1.6 | (2.7) | 0.0 | (0.0) | 0.0 | (0.0) |
| Median [IQR] | 0.0 | (0.0-0.0) | 0.0 | (0.0-4.8) | 0.0 | (0.0-0.0) | 0.0 | (0.0-0.0) |
| Chemical Content | N=10 | | N=30 | | N=30 | | N=30 | |
| Alpha-cypermethrin |  |  |  |  |  |  |  |  |
| Mean | 5.8 | (0.3) | 2.0 | (1.7-2.3) | 4.0 | (3.2-4.8) | 2.4 | (1.9-2.9) |
| Median [IQR] | 5.9 | (5.8-6.0) | 2.1 | (1.5-2.4) | 4.5 | (2.7-5.2) | 2.6 | (0.7-3.7) |
| PBO |  |  |  |  |  |  |  |  |
| Mean | 2.0 | (0.1) | 0.6 | (0.4-0.8) | 0.9 | (0.7-1.2) | 0.4 | (0.2-0.5) |
| Median [IQR] | 2.0 | (2.0-2.1) | 0.4 | (0.3-0.9) | 0.6 | (0.4-1.2) | 0.3 | (0.1-0.4) |
| CI: Confidence Interval  SD: Standard Deviation  IQR: Interquartile Range | | | | | | | | |

*Table 4: Insecticide effectiveness and chemical content results of campaign ITNs: IG2*

| **Lagdo (IG2)** | **Pre-distribution** | | **First Round**  **(12 months)** | | **Second Round**  **(24 months)** | | **Third Round**  **(36 months)** | |
| --- | --- | --- | --- | --- | --- | --- | --- | --- |
| **Susceptible mosquito strain (*An. gambiae* Kisumu)** | % (SD) | | % (95 % CI or SD) | | % (95 % CI or SD) | | % (95 % CI or SD) | |
| **Mean months since campaign** | NA | | 12.6 | | 22.5 | | 32.5 | |
| **Pre-distribution/Field samples** | N=20 | | N=30 | | N=30 | | N=30 | |
| Mortality 24 hours |  |  |  |  |  |  |  |  |
| Mean | 78.6 | (7.5) | 77.1 | (74.7-79.5) | 88.9 | (84.8-93.0) | 74.3 | (67.3-81.3) |
| Median [IQR] | 80.3 | (77.2-82.7) | 77.5 | (75.6-80.0) | 91.3 | (85.8-98.1) | 78.3 | (53.5-88.8) |
| Mortality 72 hours |  |  |  |  |  |  |  |  |
| Mean | 93.5 | (1.8) | 91.8 | (90.1-93.4) | 90.9 | (86.8-95.0) | 80.5 | (73.2-87.8) |
| Median [IQR] | 94.2 | (91.8-95.1) | 92.6 | (91.0-94.1) | 94.7 | (84.4-98.8) | 86.3 | (75.5-93.7) |
| Blood fed |  |  |  |  |  |  |  |  |
| Mean | 10.1 | (3.9) | 12.8 | (11.2-14.3) | 5.6 | (3.7-7.6) | 15.2 | (10.6-19.8) |
| Median [IQR] | 8.5 | (7.4-11.3) | 11.7 | (10.6-14.9) | 3.9 | (1.6-9.2) | 10.2 | (5.0-22.2) |
| BFI |  |  |  |  |  |  |  |  |
| Mean | 83.8 | (8.0) | 78.6 | (76.2-81.1) | 89.4 | (85.1-93.8) | 60.2 | (46.3-74.1) |
| Median [IQR] | 86.9 | (81.0-89.6) | 80.5 | (73.1-82.2) | 94.4 | (83.5-97.7) | 76.8 | (38.4-87.1) |
| **Positive control (new IG2)** | N/A | | N=1 | | N=6 | | N=6 | |
| Mortality 24 hours |  |  |  |  |  |  |  |  |
| Mean | N/A | N/A | 97.9 | (0.0) | 86.2 | (12.1) | 94.3 | (2.0) |
| Median [IQR] | N/A | N/A | 97.9 | (97.9-97.9) | 86.1 | (75.5-97.9) | 93.5 | (93.0-96.0) |
| Mortality 72 hours |  |  |  |  |  |  |  |  |
| Mean | N/A | N/A | 100 | (0.0) | 97.9 | (2.0) | 94.7 | (2.9) |
| Median [IQR] | N/A | N/A | 100 | (100-100) | 97.8 | (97.3-100) | 93.5 | (93.0-96.0) |
| Blood fed |  |  |  |  |  |  |  |  |
| Mean | N/A | N/A | 19.6 | (0.0) | 8.0 | (9.0) | 6.6 | (2.6) |
| Median [IQR] | N/A | N/A | 19.6 | (19.6-19.6) | 3.0 | (1.8-19.6) | 6.5 | (5.2-8.1) |
| BFI |  |  |  |  |  |  |  |  |
| Mean | N/A | N/A | 74.0 | (0.0) | 85.9 | (16.1) | 82.7 | (10.8) |
| Median [IQR] | N/A | N/A | 74.0 | (74.0-74.0) | 94.4 | (66.9-97.1) | 85.8 | (85.4-88.4) |
| **Untreated control (Susceptible strain)** | N=11 | | N=16 | | N=6 | | N=6 | |
| Mortality 24 hours |  |  |  |  |  |  |  |  |
| Mean | 5.0 | (2.4) | 5.5 | (6.6) | 13.0 | (9.5) | 16.8 | (3.7) |
| Median [IQR] | 5.3 | (3.0-6.5) | 4.0 | (3.4-4.0) | 10.6 | (4.2-22.5) | 16.5 | (13.1-19.0) |
| Mortality 72 hours |  |  |  |  |  |  |  |  |
| Mean | 10.3 | (1.7) | 11.5 | (5.4) | 17.2 | (8.2) | 17.8 | (4.3) |
| Median [IQR] | 9.9 | (9.0-11.4) | 10.0 | (9.2-11.3) | 16.4 | (8.6-26.5) | 18.7 | (13.1-19.0) |
| Blood fed |  |  |  |  |  |  |  |  |
| Mean | 66.6 | (9.7) | 60.6 | (5.4) | 61.9 | (15.0) | 41.4 | (14.2) |
| Median [IQR] | 70.1 | (59.8-75.0) | 59.8 | (56.7-64.0) | 60.6 | (53.7-68.1) | 39.9 | (26.6-57.4) |
| **Resistant mosquito strain (*An. coluzzii* Monatele)** | % (SD) | | % (95 % CI or SD) | | % (95 % CI or SD) | | % (95 % CI or SD) | |
| **Pre-distribution/Field samples** | N=20 | | N=30 | | N=30 | | N=30 | |
| **Mortality 24 hours** |  |  |  |  |  |  |  |  |
| Mean | 79.5 | (11.1) | 54.4 | (46.9-61.8) | 51.7 | (41.2-62.1) | 42.6 | (35.4-49.8) |
| Median [IQR] | 78.0 | (69.9-88.8) | 56.3 | (29.6-82.2) | 52.2 | (29.9-69.7) | 45.6 | (26.4-54.9) |
| **Mortality 72 hours** |  |  |  |  |  |  |  |  |
| Mean | 86.7 | (9.8) | 70.3 | (64.6-75.9) | 71.0 | (64.5-77.5) | 55.3 | (46.2-64.4) |
| Median [IQR] | 87.7 | (81.4-94.7) | 69.6 | (52.9-89.6) | 69.6 | (60.7-79.3) | 64.1 | (33.5-71.8) |
| **Blood fed** |  |  |  |  |  |  |  |  |
| Mean | 0.2 | (0.4) | 1.3 | (0.8-1.8) | 0.8 | (0.5-1.0) | 7.7 | (5.5-9.9) |
| Median [IQR] | 0.0 | (0.0-0.0) | 1.3 | (0.0-2.0) | 0.7 | (0.0-1.3) | 6.2 | (3.5-9.6) |
| **BFI** |  |  |  |  |  |  |  |  |
| Mean | 89.5 | (29.7) | 43.4 | (21.8-64.9) | 84.1 | (77.7-90.4) | 9.0 | (-38.9-57.0) |
| Median [IQR] | 100 | (100-100) | 51.9 | (25.5-100.0) | 90.5 | (77.7-100) | 45.3 | (-17.7-68.5) |
| **Positive control (new IG2)** | N/A | | N=6 | | N=6 | | N=6 | |
| **Mortality 24 hours** |  |  |  |  |  |  |  |  |
| Mean | N/A | N/A | 54.5 | (12.2) | 50.6 | (0.0) | 56.5 | (13.9) |
| Median [IQR] | N/A | N/A | 55.6 | (50.6-63.6) | 50.6 | (50.6-50.6) | 50.9 | (50.6-51.2) |
| **Mortality 72 hours** |  |  |  |  |  |  |  |  |
| Mean | N/A | N/A | 60.5 | (16.5) | 62.0 | (0.0) | 68.7 | (12.3) |
| Median [IQR] | N/A | N/A | 61.8 | (53.1-71.6) | 62.0 | (62.0-62.0) | 64.2 | (62.0-66.3) |
| **Blood fed** |  |  |  |  |  |  |  |  |
| Mean | N/A | N/A | 0.9 | (2.3) | 0.0 | (0.0) | 0.8 | (0.9) |
| Median [IQR] | N/A | N/A | 0.0 | (0.0-0.0) | 0.0 | (0.0-0.0) | 0.6 | (0.0-1.2) |
| **BFI** |  |  |  |  |  |  |  |  |
| Mean | N/A | N/A | 65.9 | (83.4) | 100 | (0.0) | 91.9 | (10.6) |
| Median [IQR] | N/A | N/A | 100 | (100-100) | 100 | (100-100) | 96.9 | (82.0-100) |
| **Untreated control** | N=2 | | N=6 | | N=6 | | N=6 | |
| **Mortality 24 hours** |  |  |  |  |  |  |  |  |
| Mean | 9.3 | (4.3) | 14.4 | (2.9) | 11.1 | (7.6) | 14.5 | (4.5) |
| Median [IQR] | 9.3 | (6.2-12.3) | 13.6 | (12.6-16.5) | 10.6 | (4.7-17.2) | 15.0 | (11.0-17.5) |
| **Mortality 72 hours** |  |  |  |  |  |  |  |  |
| Mean | 13.7 | (10.5) | 21.1 | (4.5) | 12.3 | (8.1) | 19.3 | (4.8) |
| Median [IQR] | 13.7 | (6.2-21.1) | 20.6 | (18.8-23.8) | 11.9 | (4.8-19.0) | 19.6 | (16.7-20.5) |
| **Blood fed** |  |  |  |  |  |  |  |  |
| Mean | 4.0 | (4.2) | 3.1 | (4.2) | 8.0 | (6.8) | 11.0 | (5.7) |
| Median [IQR] | 4.0 | (1.0-7.0) | 1.5 | (1.1-2.0) | 5.7 | (2.7-12.1) | 11.5 | (5.1-12.7) |
| **Chemical Content** | N=10 | | N=30 | | N=30 | | N=30 | |
| **Alpha-cypermethrin** |  |  |  |  |  |  |  |  |
| Mean | 2.2 | (0.2) | 1.7 | (1.3-2.0) | 1.3 | (1.0-1.5) | 0.9 | (0.6-1.1) |
| Median [IQR] | 2.2 | (2.1-2.4) | 1.9 | (1.2-2.2) | 1.4 | (0.7-1.6) | 0.7 | (0.2-1.6) |
| **CFP** |  |  |  |  |  |  |  |  |
| Mean | 4.0 | (0.3) | 2.4 | (1.9-3.0) | 1.5 | (1.1-2.0) | 1.0 | (0.6-1.5) |
| Median [IQR] | 3.9 | (3.7-4.1) | 2.5 | (1.5-3.4) | 1.3 | (0.6-2.2) | 0.6 | (0.1-1.7) |
| N/A: Not Applicable | | | | | | | | |

*Table 5: Handling of campaign nets*

|  | **First Round**  **(12 months)**  **n (%)** | **Second Round**  **(24 months)**  **n (%)** | **Third Round**  **(36 months)**  **n (%)** |
| --- | --- | --- | --- |
| **Lagdo (IG2)** |  |  |  |
| **Location found** | **N=30** | **N=30** | **N=30** |
| Hanging and folded or tied | 6 (20.0%) | 0 (0.0%) | 3 (10.0%) |
| Hanging loose | 17 (56.7%) | 25 (83.3%) | 18 (60.0%) |
| Not hanging | 1 (3.3%) | 4 (13.3%) | 8 (26.7%) |
| Stored unpacked | 4 (13.3%) | 1 (3.3%) | 0 (0.0%) |
| **Type of sleeping space (if used)** | **N=30** | **N=30** | **N=30** |
| Bed | 13 (43.3%) | 16 (53.3%) | 28 (93.3%) |
| Mattress | 2 (6.7%) | 4 (13.3%) | 0 (0.0%) |
| Mat/ground | 15 (50.0%) | 10 (33.3%) | 2 (6.7%) |
| **Net users** | **N=30** | **N=30** | **N=30** |
| Child(ren) only | 7 (23.3%) | 4 (13.3%) | 7 (23.3%) |
| Child(ren) and adult(s) | 17 (56.7%) | 14 (46.7%) | 11 (36.7%) |
| Adult(s) only | 6 (20.0%) | 12 (40.0%) | 12 (40.0%) |
| **Pitoa (DNP)** |  |  |  |
| **Location found** | **N=30** | **N=30** | **N=30** |
| Hanging and folded or tied | 4 (13.3%) | 2 (6.7%) | 3 (10.0%) |
| Hanging loose | 25 (83.3%) | 23 (76.7%) | 21 (70.0%) |
| Not hanging | 0 (0.0%) | 2 (6.7%) | 4 (13.3%) |
| Stored unpacked | 1 (3.3%) | 2 (6.7%) | 1 (3.3%) |
| **Type of sleeping space (if used)** | **N=30** | **N=30** | **N=30** |
| Bed | 16 (53.3%) | 19 (63.3%) | 21 (70.0%) |
| Mattress | 5 (16.7%) | 4 (13.3%) | 3 (10.0%) |
| Mat/ground | 9 (30.0%) | 7 (23.3%) | 6 (20.0%) |
| **Net users** | **N=30** | **N=30** | **N=30** |
| Child(ren) only | 7 (23.3%) | 7 (23.3%) | 5 (16.7%) |
| Child(ren) and adult(s) | 11 (36.7%) | 11 (36.7%) | 7 (23.3%) |
| Adult(s) only | 12 (40.0%) | 12 (40.0%) | 18 (60.0%) |

*Table 6: Reported use of campaign nets*

|  | **First Round**  **(12 months)**  **n (%)** | **Second Round**  **(24 months)**  **n (%)** | **Third Round**  **(36 months)**  **n (%)** |
| --- | --- | --- | --- |
| **Lagdo (IG2)** |  |  |  |
| **Used last night** | **N=30** | **N=30** | **N=30** |
| Last night | 21 (70.0%) | 22 (73.3%) | 21 (70.0%) |
| **Used last week** | **N=30** | **N=30** | **N=30** |
| Every night | 21 (70.0%) | 14 (46.7%) | 17 (56.7%) |
| Most nights (5-6 nights) | 1 (3.3%) | 9 (30.0%) | 3 (10.0%) |
| Some nights (1-4 nights) | 0 (0.0%) | 3 (10.0%) | 2 (6.7%) |
| Not used last week | 6 (20.0%) | 4 (13.3%) | 8 (26.7%) |
| Never used | 2 (6.7%) | 0 (0.0%) | 0 (0.0%) |
| **Seasonal use** | **N=30** | **N=30** | **N=30** |
| Equally in rainy and dry seasons | 24 (80.0%) | 28 (93.3%) | 25 (83.3%) |
| Mainly rainy season, sometimes also dry season | 2 (6.7%) | 2 (6.7%) | 2 (6.7%) |
| Rainy season only | 1 (3.3%) | 0 (0.0%) | 3 (10.0%) |
| Mainly in dry season | 0 (0.0%) | 0 (0.0%) | 0 (0.0%) |
| Not used | 2 (6.7%) | 0 (0.0%) | 0 (0.0%) |
| Don’t know | 1 (3.3%) | 0 (0.0%) | 0 (0.0%) |
| **Pitoa (DNP)** |  |  |  |
| **Used last night** | **N=30** | **N=30** | **N=30** |
| Last night | 29 (96.7%) | 25 (83.3%) | 17 (56.7%) |
| **Used last week** | **N=30** | **N=30** | **N=30** |
| Every night | 26 (86.7%) | 17 (56.7%) | 13 (43.3%) |
| Most nights (5-6 nights) | 0 (0.0%) | 5 (16.7%) | 4 (13.3%) |
| Some nights (1-4 nights) | 3 (10.0%) | 4 (13.3%) | 5 (16.7%) |
| Not used last week | 1 (3.3%) | 2 (6.7%) | 6 (20.0%) |
| Never used | 0 (0.0%) | 1 (3.3%) | 1 (3.3%) |
| **Seasonal use** | **N=30** | **N=30** | **N=30** |
| Equally in rainy and dry seasons | 29 (96.7%) | 24 (80.0%) | 26 (86.7%) |
| Mainly rainy season, sometimes also dry season | 0 (0.0%) | 0 (0.0%) | 0 (0.0%) |
| Rainy season only | 1 (3.3%) | 5 (16.7%) | 4 (13.3%) |
| Mainly in dry season | 0 (0.0%) | 0 (0.0%) | 0 (0.0%) |
| Not used | 0 (0.0%) | 1 (3.3%) | 0 (0.0%) |
| Don’t know | 0 (0.0%) | 0 (0.0%) | 0 (0.0%) |

*Table 7: Reported washing of campaign nets*

|  | **First Round**  **(12 months)**  **n (%)** | **Second Round**  **(24 months)**  **n (%)** | **Third Round**  **(36 months)**  **n (%)** |
| --- | --- | --- | --- |
| **Lagdo (IG2)** |  |  |  |
| **Ever washed** | **N=30** | **N=30** | **N=30** |
| Ever washed | 20 (66.7%) | 28 (93.3%) | 28 (93.3%) |
| **Washes in the last six months among washed nets** | **N=20** | **N=20** | **N=28** |
| Mean | 2.7 [2.0-3.4] | 3.2 [2.5-3.9] | 2.7 [2.1-3.3] |
| Median [IQR] | 3.0 [2.0-3.0] | 3.0 [1.0-5.0] | 2.5 [2.0-4.0] |
| **Soap used for last wash** | **N=20** | **N=28** | **N=28** |
| Soap bar | 15 (75.0%) | 24 (85.7%) | 15 (53.6%) |
| Detergent or bleach | 5 (25.0%) | 3 (10.7%) | 13 (46.4%) |
| Mix | 0 (0.0%) | 1 (3.6%) | 0 (0.0%) |
| None | 0 (0.0%) | 0 (0.0%) | 0 (0.0%) |
| **How was net dried after last wash?** | **N=20** | **N=28** | **N=28** |
| Outside on a line | 18 (90.0%) | 24 (85.7%) | 25 (89.3%) |
| Inside on a line | 2 (10.0%) | 2 (7.1%) | 0 (0.0%) |
| Outside on bush or fence | 0 (0.0%) | 2 (7.1%) | 3 (10.7%) |
| Inside on furniture or floor | 0 (0.0%) | 0 (0.0%) | 0 (0.0%) |
| Don’t know | 0 (0.0%) | 0 (0.0%) | 0 (0.0%) |
| **Where dried after last wash** | **N=20** | **N=28** | **N=28** |
| Shade | 1 (5.0%) | 4 (14.3%) | 3 (10.7%) |
| Sun | 19 (95.0%) | 24 (85.7%) | 25 (89.3%) |
| Don’t know | 0 (0.0%) | 0 (0.0%) | 0 (0.0%) |
| **Pitoa (DNP)** |  |  |  |
| **Ever washed** | **N=30** | **N=30** | **N=30** |
| Ever washed | 25 (83.3%) | 25 (83.3%) | 28 (93.3%) |
| **Washes in the last six months among washed nets** | **N=25** | **N=25** | **N=28** |
| Mean | 2.5 [1.7-3.3] | 2.5 [1.3-2.2] | 2.9 [2.4-3.3] |
| Median [IQR] | 2.0 [1.0-3.0] | 1.0 [1.0-3.0] | 3.0 [2.0-3.5] |
| **Soap used for last wash** | **N=25** | **N=25** | **N=28** |
| Soap bar | 17 (68.0%) | 15 (60.0%) | 11 (39.3%) |
| Detergent or bleach | 7 (28.0%) | 8 (32.0%) | 15 (53.6%) |
| Mix | 0 (0.0%) | 2 (8.0%) | 2 (7.1%) |
| None | 1 (4.0%) | 0 (0.0%) | 0 (0.0%) |
| **How was net dried after last wash?** | **N=25** | **N=25** | **N=28** |
| Outside on a line | 25 (100.0%) | 22 (88.0%) | 28 (100.0%) |
| Inside on a line | 0 (0.0%) | 0 (0.0%) | 0 (0.0%) |
| Outside on bush or fence | 0 (0.0%) | 3 (12.0%) | 0 (0.0%) |
| Inside on furniture or floor | 0 (0.0%) | 0 (0.0%) | 0 (0.0%) |
| Don’t know | 0 (0.0%) | 0 (0.0%) | 0 (0.0%) |
| **Where dried after last wash** | **N=25** | **N=25** | **N=28** |
| Shade | 0 (0.0%) | 7 (28.0%) | 11 (39.3%) |
| Sun | 25 (100.0%) | 18 (72.0%) | 17 (60.7%) |
| Don’t know | 0 (0.0%) | 0 (0.0%) | 0 (0.0%) |

*Table 8: Physical integrity of observed ITNs*

|  | **First Round**  **(12 months)**  **n (%)** | **Second Round**  **(24 months)**  **n (%)** | **Third Round**  **(36 months)**  **n (%)** |
| --- | --- | --- | --- |
| **Lagdo (IG2)** |  |  |  |
| **Integrity Classification** | **N=30** | **N=30** | **N=30** |
| ITNs with any holes | 20 (66.7%) | 20 (66.7%) | 24 (80.0%) |
| ITNs classified as “Good” | 20 (66.7%) | 18 (60.0%) | 12 (40.0%) |
| ITNs classified as “Too torn” | 1 (3.3%) | 7 (23.3%) | 7 (23.3%) |
| ITNs classified as “Serviceable” | 29 (96.7%) | 23 (76.7%) | 23 (76.7%) |
| **Among ITNs with any holes** | **N=20** | **N=20** | **N=20** |
| Median pHI for ITNs with any holes | 108.0 | 187.0 | 318.5 |
| **Pitoa (DNP)** |  |  |  |
| **Integrity Classification** | **N=30** | **N=30** | **N=30** |
| ITNs with any holes | 17 (56.7%) | 24 (80.0%) | 23 (76.7%) |
| ITNs classified as “Good” | 21 (70.0%) | 21 (70.0%) | 19 (63.3%) |
| ITNs classified as “Too torn” | 4 (13.3%) | 3 (10.0%) | 4 (13.3%) |
| ITNs classified as “Serviceable” | 26 (86.7%) | 27 (90.0%) | 26 (86.7%) |
| **Among ITNs with any holes** | **N=17** | **N=24** | **N=24** |
| Median pHI for ITNs with any holes | 143.0 | 32.0 | 57.0 |
